# Supplementary material for: Facile route to synthesize Fe3O4@acacia–SO3H nanocomposite as a heterogeneous magnetic system for catalytic applications
Source: Royal Society of Chemistry journal article supplement (doi:10.1039/d0ra07986c), 2020-01-01
Supplement: d0ra07986c1.pdf [file d0ra07986c1.pdf]

*Supporting Information*

**Facile Route to Synthesis Fe<sub>3</sub>O<sub>4</sub>@acacia-SO<sub>3</sub>H Nanocomposite as Heterogeneous Magnetic System for Catalytic Applications**

Reza Taheri-Ledari<sup>1</sup>, Mir Saeed Esmaili<sup>1</sup>, Zahra Varzi<sup>1</sup>, Reza Eivazzadeh-Keihan<sup>1</sup>, Ali Maleki<sup>1,\*</sup> and Ahmed Esmail Shalan<sup>2,3,\*</sup>

<sup>1</sup> Catalysts and Organic Synthesis Research Laboratory, Department of Chemistry, Iran University of Science and Technology (IUST), Tehran 16846-13114, Iran.

<sup>2</sup> Central Metallurgical Research and Development Institute (CMRDI), P.O. Box 87, Helwan, Cairo 11421, Egypt.

<sup>3</sup> BCMaterials, Basque Center for Materials, Applications and Nanostructures, Martina Casiano, UPV/EHU Science Park, Barrio Sarriena s/n, Leioa 48940, Spain.

\*Corresponding authors. (A. M) Tel.: +98 21 77240640-50; fax: +98 21 73021584. E-mail address: [maleki@iust.ac.ir](mailto:maleki@iust.ac.ir); (A. E. S.) E-mail: [a.shalan133@gmail.com](mailto:a.shalan133@gmail.com)

 Author's ORCID:

Reza Taheri-Ledari: <https://orcid.org/0000-0002-6511-9411>

Ali Maleki: <https://orcid.org/0000-0001-5490-3350>

Ahmed Esmail Shalan: <https://orcid.org/0000-0002-3424-1609>

| Content                                                             | Page |
|---------------------------------------------------------------------|------|
| <b>Table S1.</b> The applied materials and equipment                | S3   |
| <b>Figure S1.</b> <sup>1</sup> H-NMR spectrum of product <i>a</i>   | S4   |
| <b>Figure S2.</b> <sup>13</sup> C-NMR spectrum of product <i>a</i>  | S5   |
| <b>Figure S3.</b> <sup>1</sup> H-NMR spectrum of product <i>b</i>   | S6   |
| <b>Figure S4.</b> <sup>13</sup> C-NMR spectrum of product <i>b</i>  | S7   |
| <b>Figure S5.</b> <sup>1</sup> H-NMR spectrum of product <i>c</i>   | S8   |
| <b>Figure S6.</b> <sup>13</sup> C-NMR spectrum of product <i>c</i>  | S9   |
| <b>Figure S7.</b> <sup>1</sup> H-NMR spectrum of product <i>d</i>   | S10  |
| <b>Figure S8.</b> <sup>13</sup> C-NMR spectrum of product <i>d</i>  | S11  |
| <b>Figure S9.</b> <sup>1</sup> H-NMR spectrum of product <i>e</i>   | S12  |
| <b>Figure S10.</b> <sup>13</sup> C-NMR spectrum of product <i>e</i> | S13  |

|                                                                      |     |
|----------------------------------------------------------------------|-----|
| <b>Figure S11.</b> $^1\text{H}$ -NMR spectrum of product <i>f</i>    | S14 |
| <b>Figure S12.</b> $^{13}\text{C}$ -NMR spectrum of product <i>f</i> | S15 |
| <b>Figure S13.</b> $^1\text{H}$ -NMR spectrum of product <i>g</i>    | S16 |
| <b>Figure S14.</b> $^{13}\text{C}$ -NMR spectrum of product <i>g</i> | S17 |
| <b>Figure S15.</b> $^1\text{H}$ -NMR spectrum of product <i>h</i>    | S18 |
| <b>Figure S16.</b> $^{13}\text{C}$ -NMR spectrum of product <i>h</i> | S19 |
| <b>Figure S17.</b> $^1\text{H}$ -NMR spectrum of product <i>i</i>    | S20 |
| <b>Figure S18.</b> $^{13}\text{C}$ -NMR spectrum of product <i>i</i> | S21 |
| <b>Figure S19.</b> $^1\text{H}$ -NMR spectrum of product <i>j</i>    | S22 |
| <b>Figure S20.</b> $^{13}\text{C}$ -NMR spectrum of product <i>j</i> | S23 |

**Table S1.** The applied materials and equipment.

| <b>Material / equipment</b>          | <b>Purity / Brand</b>                                  |
|--------------------------------------|--------------------------------------------------------|
| FeCl <sub>2</sub> .4H <sub>2</sub> O | Sigma Aldrich, 98%                                     |
| FeCl <sub>3</sub> .6H <sub>2</sub> O | Sigma Aldrich, 98%                                     |
| Ammonium acetate                     | Merck                                                  |
| Acacia gum                           | Sigma Aldrich                                          |
| Solvents                             | Merck                                                  |
| Aldehyde derivatives                 | Sigma Aldrich                                          |
| Dimedone                             | Sigma Aldrich, 95%                                     |
| Chlorosulfonic acid                  | Sigma Aldrich, 99%                                     |
| Silica gel for column chromatography | Sigma Aldrich, 60%                                     |
| Ultrasound bath                      | KQ-250 DE - 50 kHz and power of 250 W L <sup>-1</sup>  |
| Melting point measurement apparatus  | Electrothermal 9100                                    |
| FT-IR spectroscopy                   | Shimadzu IR-470                                        |
| EDX spectroscopy                     | Numerix DXP-X10P                                       |
| TGA apparatus                        | Bahr-STA 504 instrument under argon atmosphere         |
| VSM apparatus                        | Lakeshore 7407 and Meghnatis Kavir Kashan Co.,<br>Iran |
| XRD spectroscopy                     | DRON-8 X-ray diffractometer                            |
| FESEM analysis                       | Sigma-Zeiss microscope with attached camera            |
| TEM analysis                         | Philips CM200                                          |
| NMR spectroscopy                     | Bruker DRX-300 Avance spectrometer at 300MHz           |
| ICP                                  | Agilent 7500ce                                         |

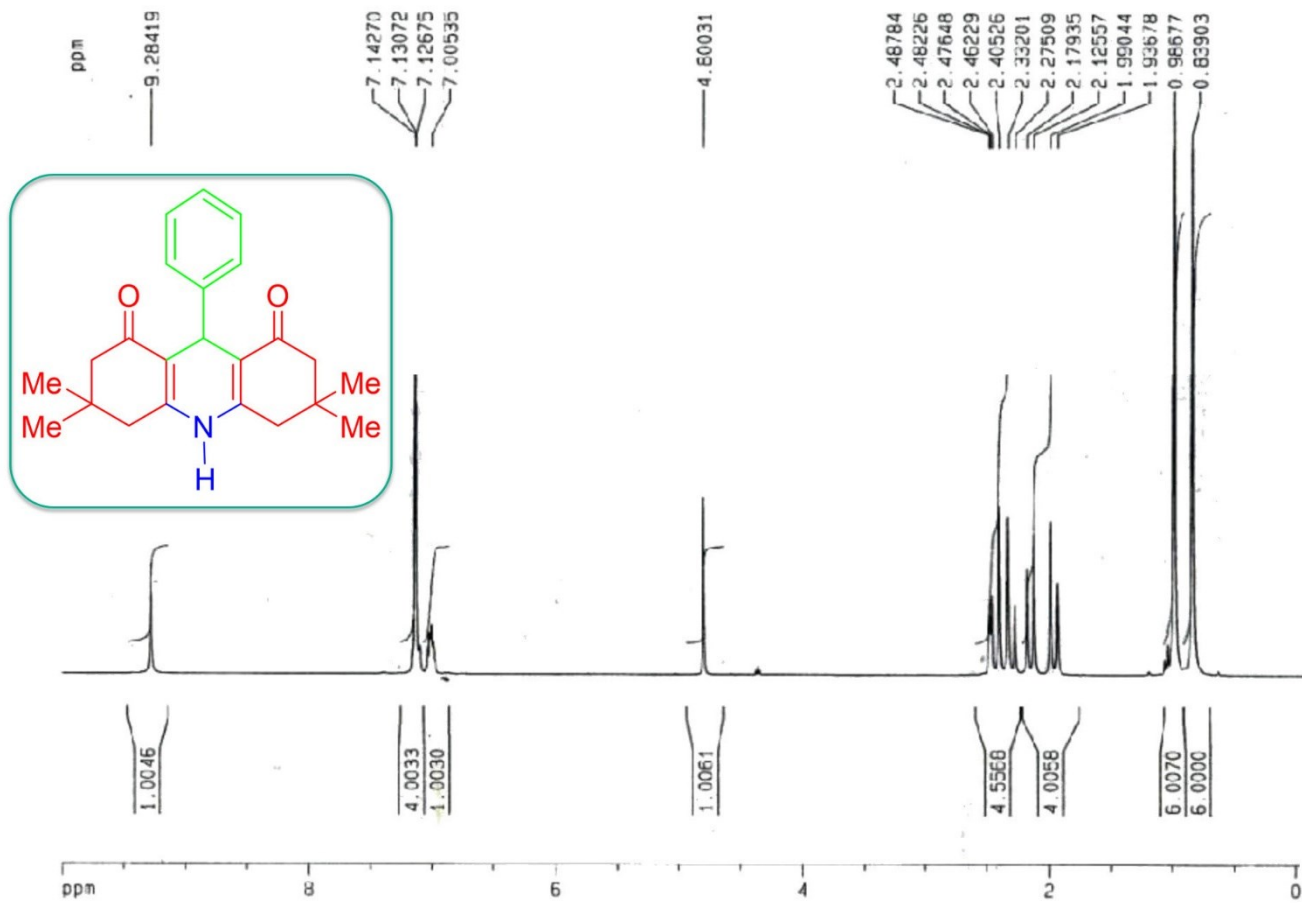

Figure S1. <sup>1</sup>H-NMR spectrum of product *a*.

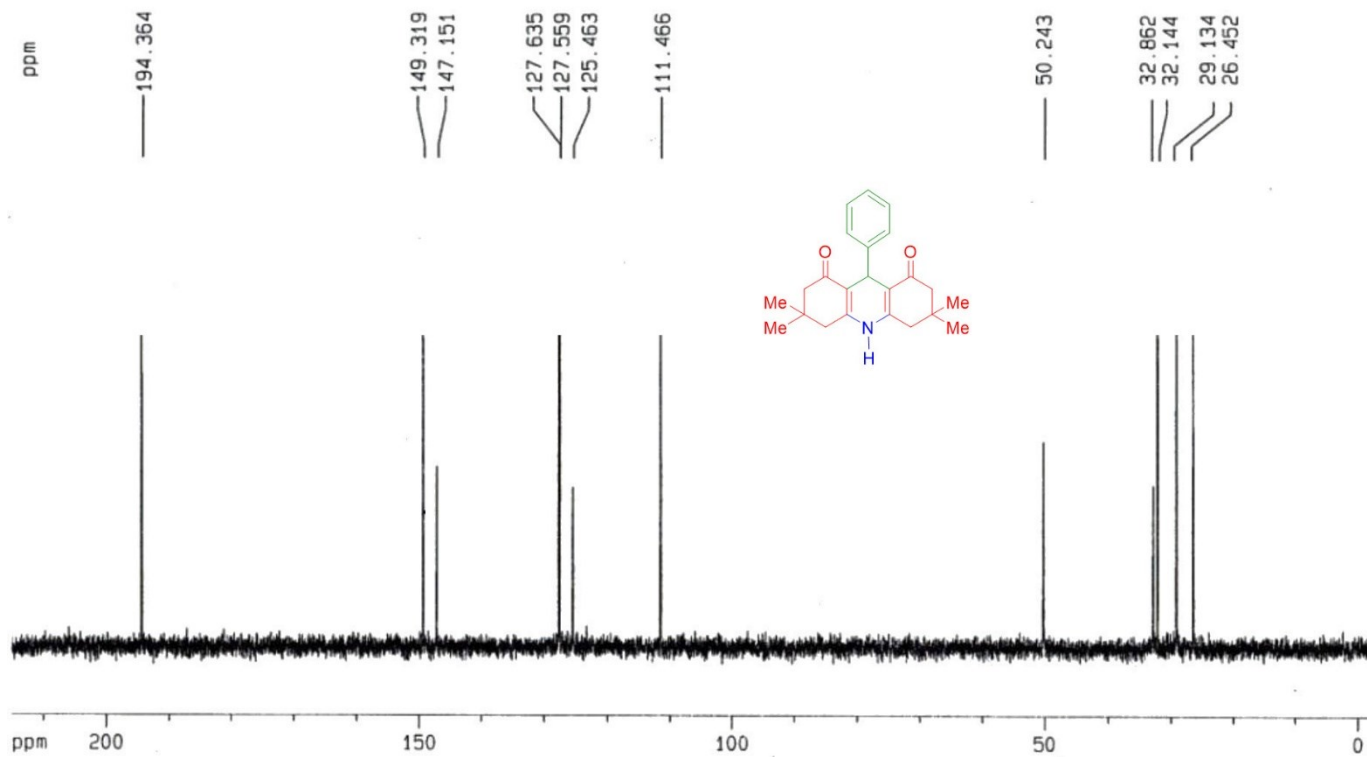

Figure S2.  $^{13}\text{C}$ -NMR spectrum of product *a*.

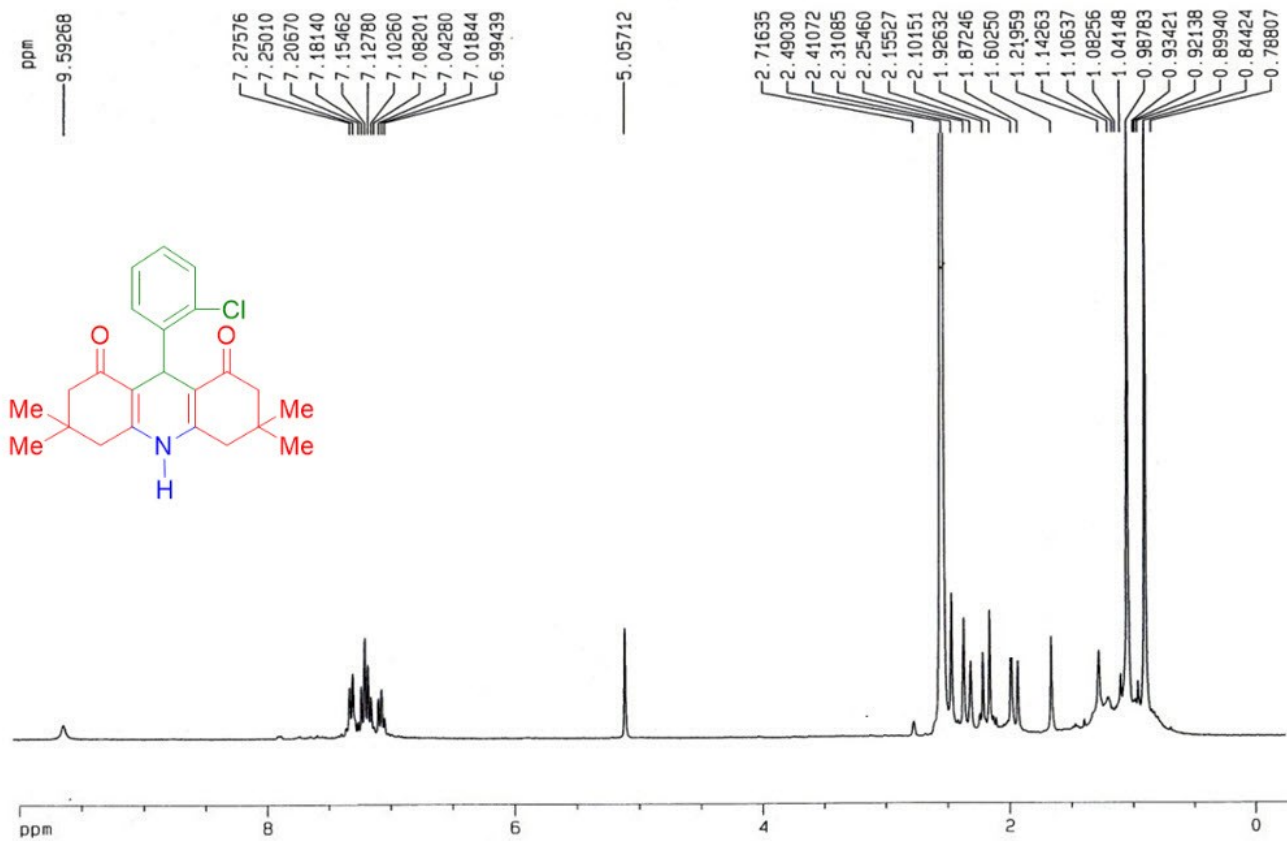

**Figure S3.** <sup>1</sup>H-NMR spectrum of product *b*.

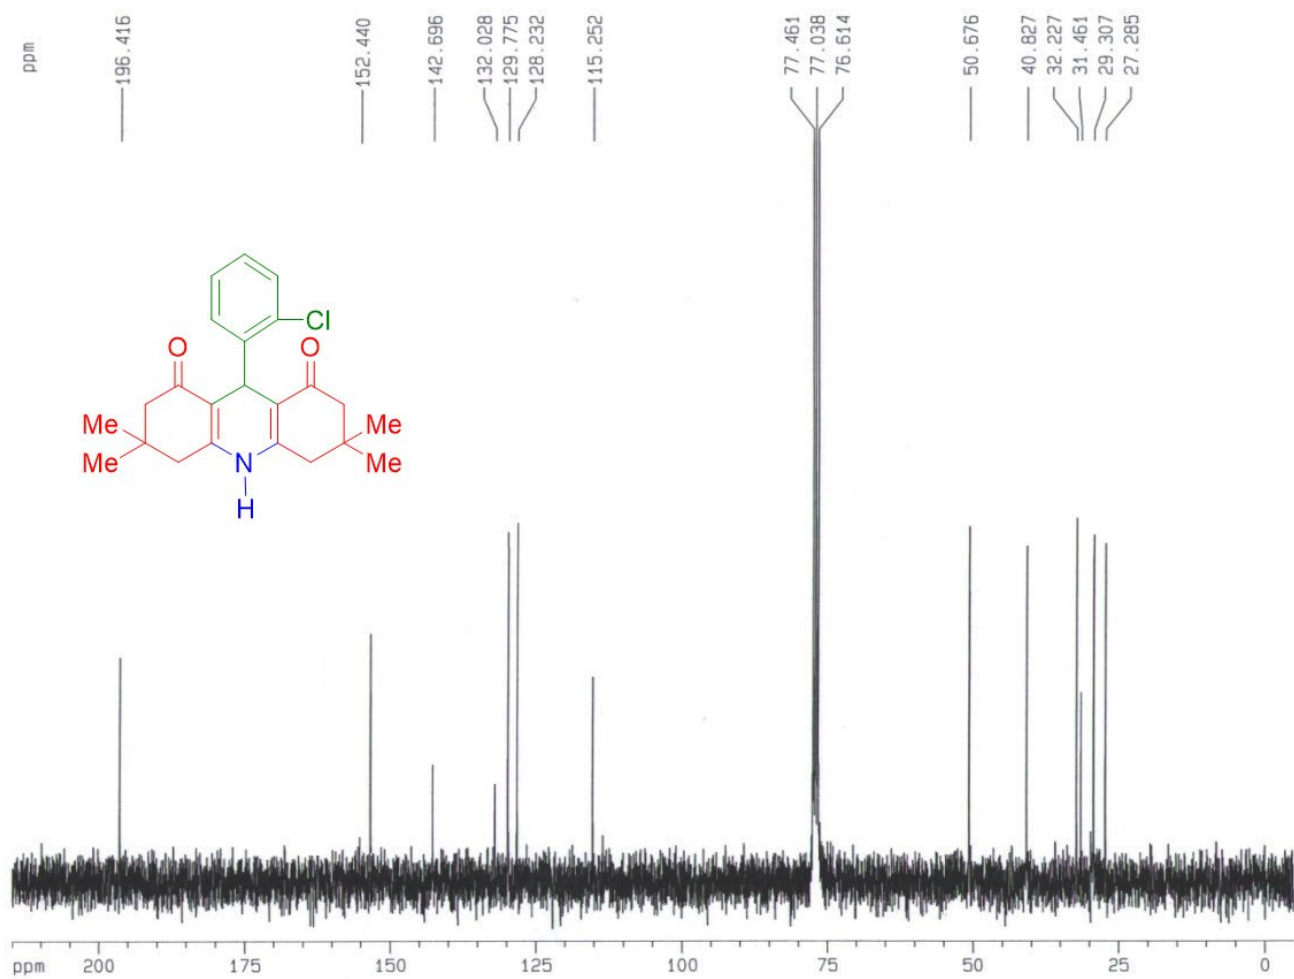

**Figure S4.**  $^{13}\text{C}$ -NMR spectrum of product **b**.

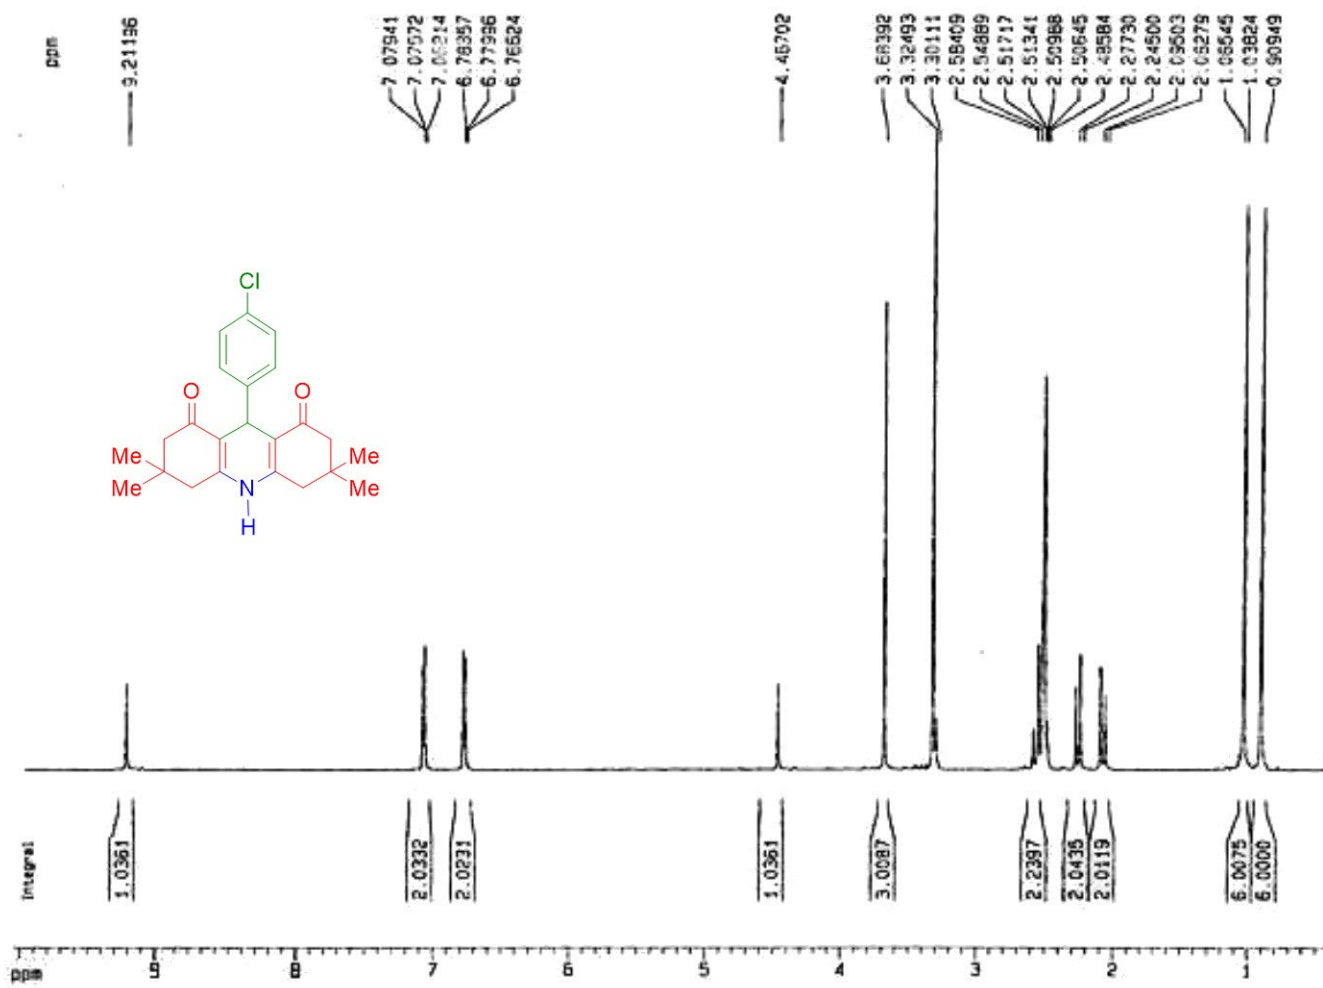

Figure S5. <sup>1</sup>H-NMR spectrum of product *c*.



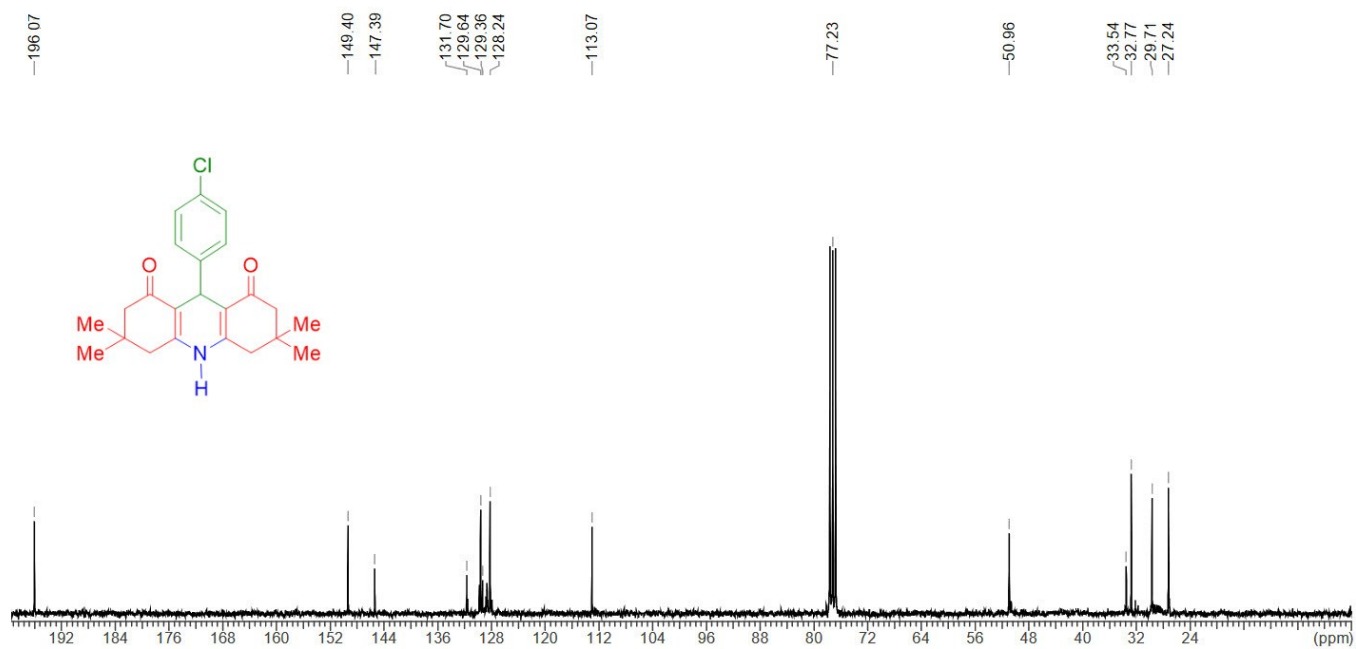

**Figure S6.** <sup>13</sup>C-NMR spectrum of product **c**.

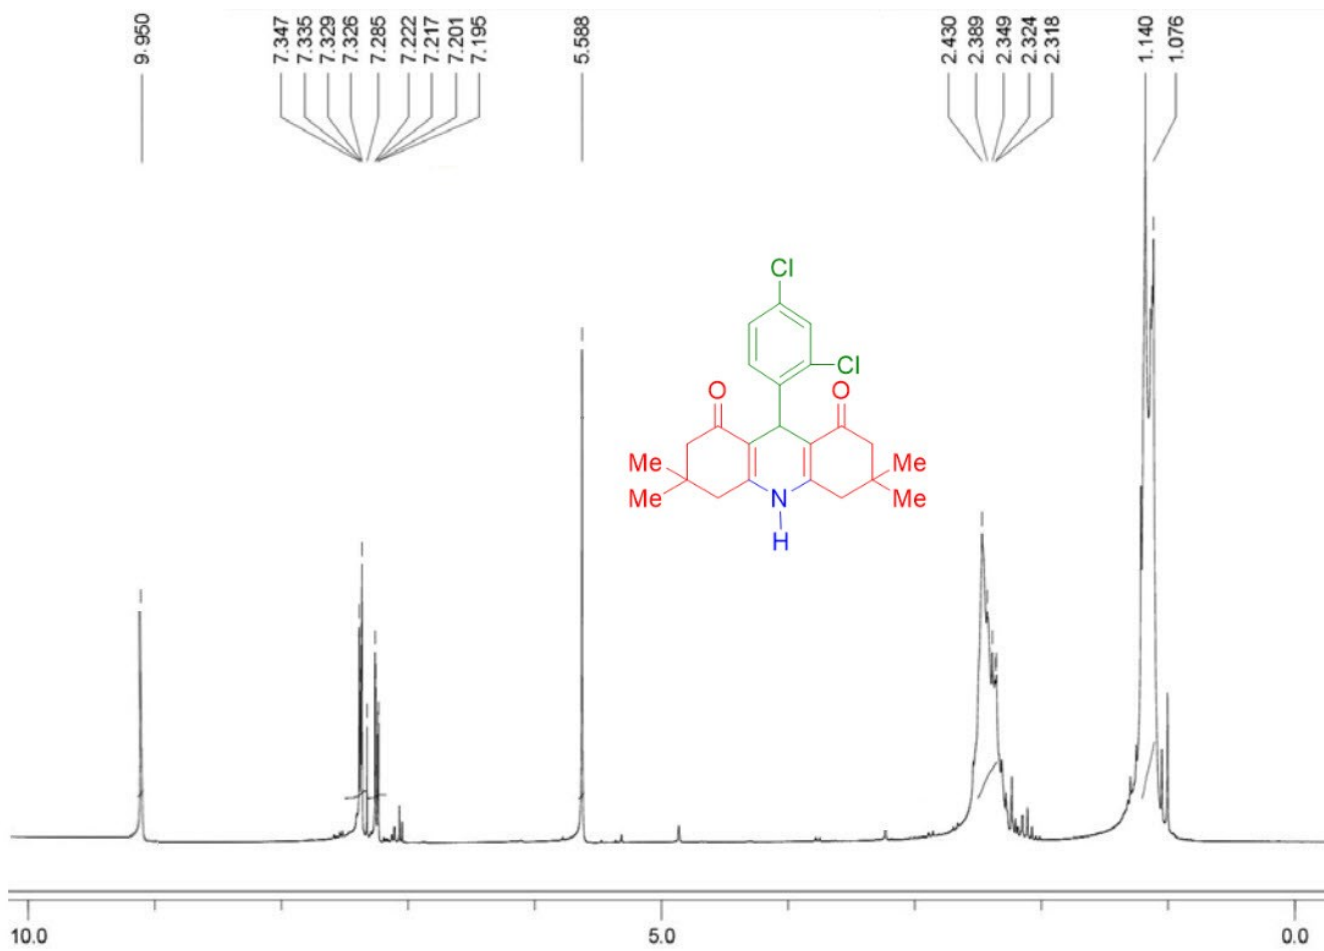

Figure S7. <sup>1</sup>H-NMR spectrum of product *d*.

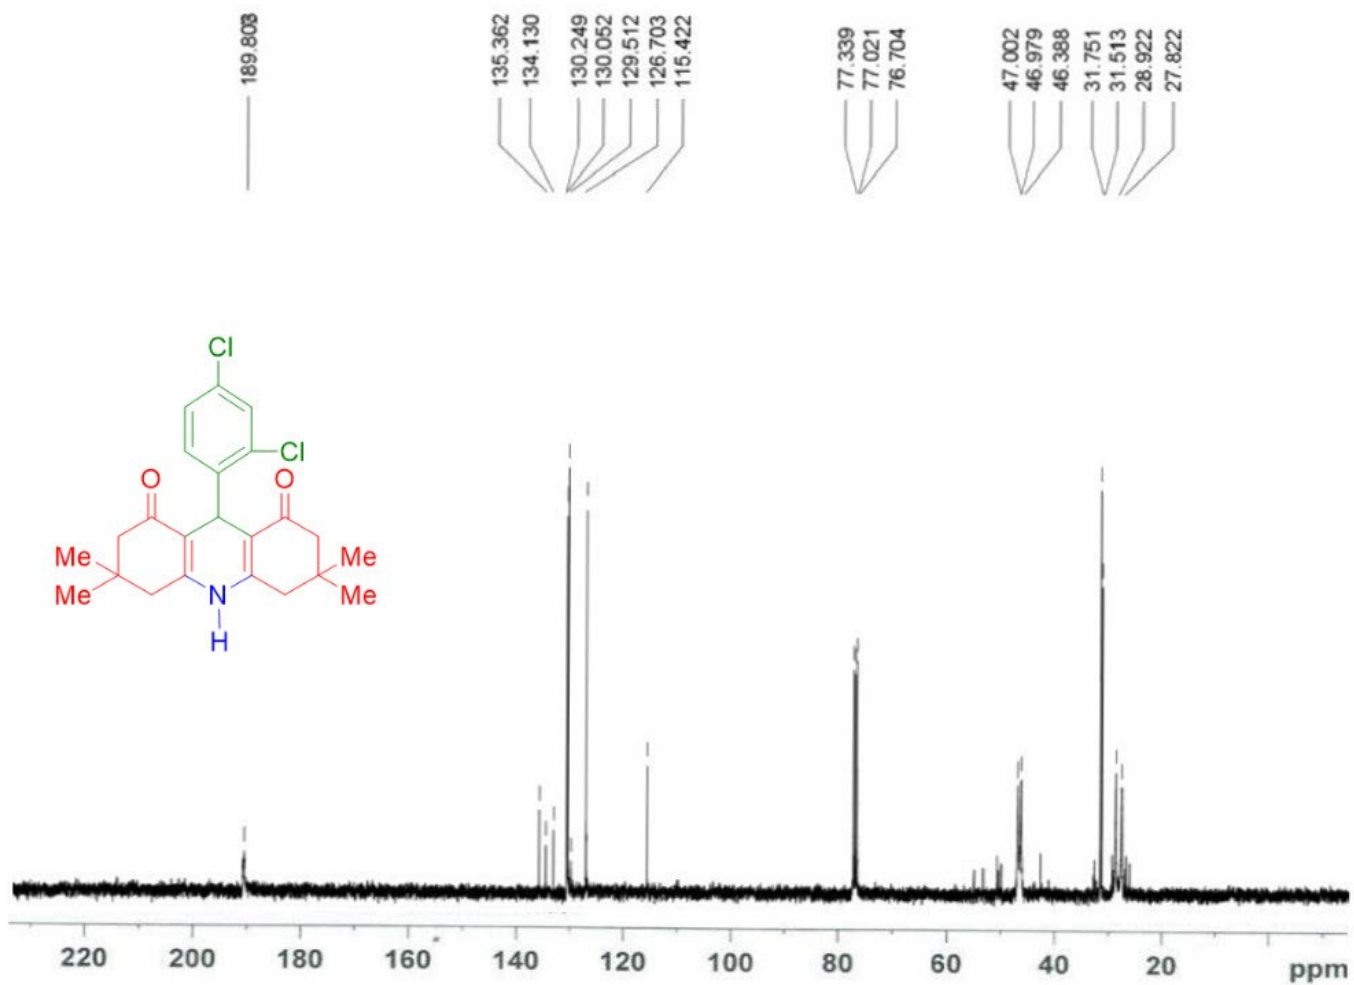

Figure S8. <sup>13</sup>C-NMR spectrum of product *d*.

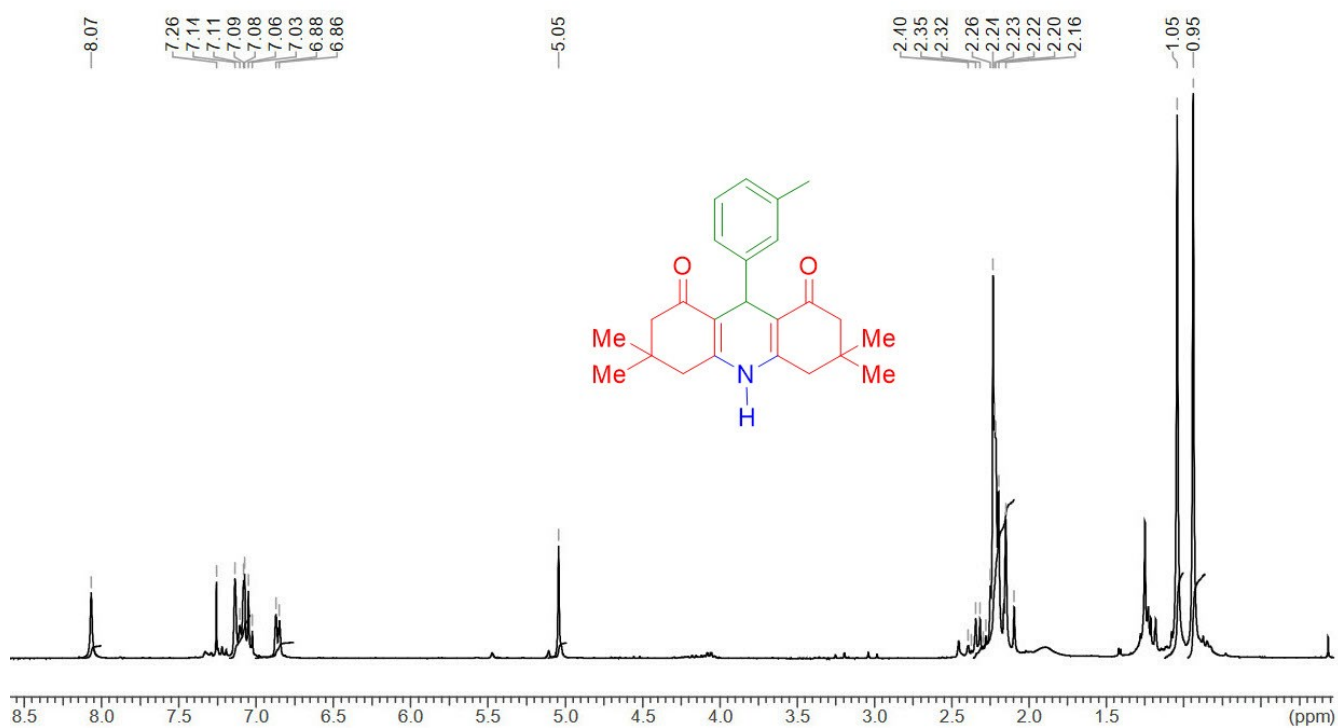

**Figure S9.**  $^1\text{H-NMR}$  spectrum of product *e*.

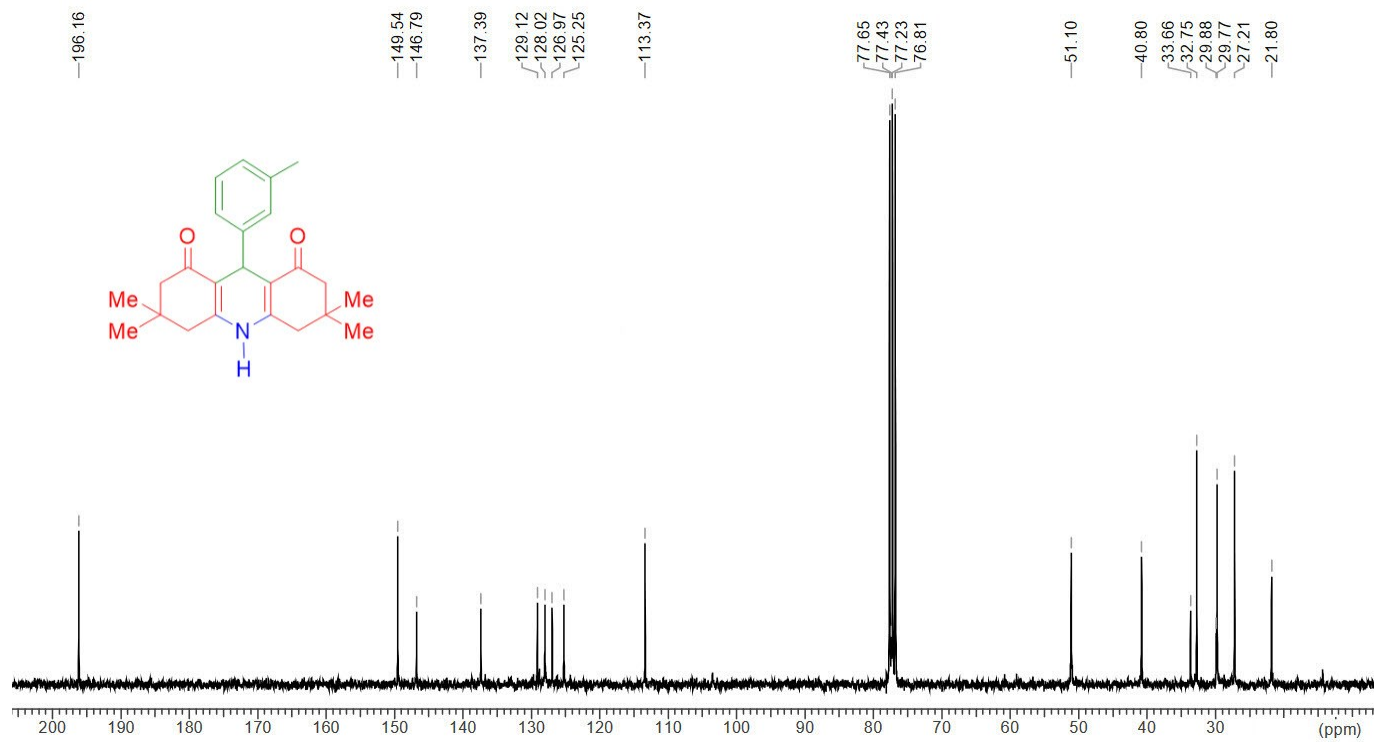

Figure S10.  $^{13}\text{C}$ -NMR spectrum of product *e*.

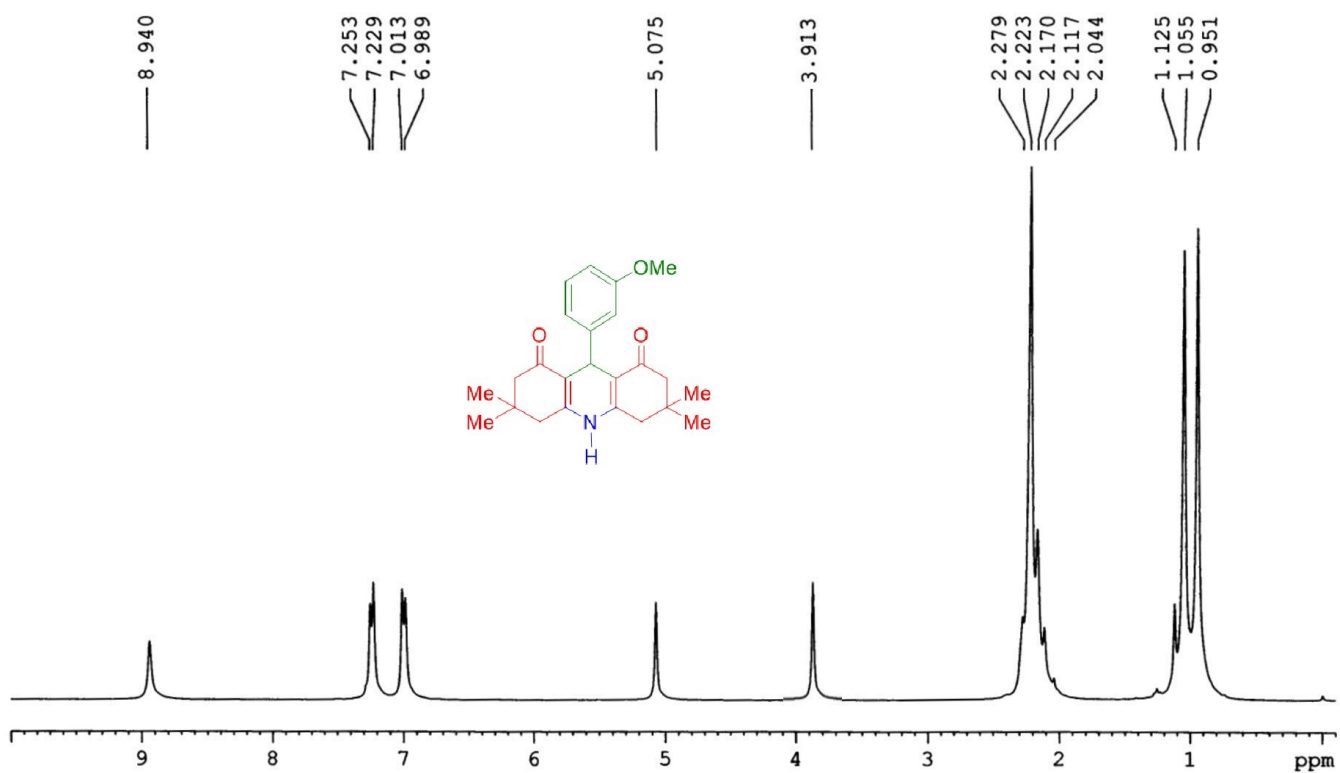

**Figure S11.** <sup>1</sup>H-NMR spectrum of product *f*.

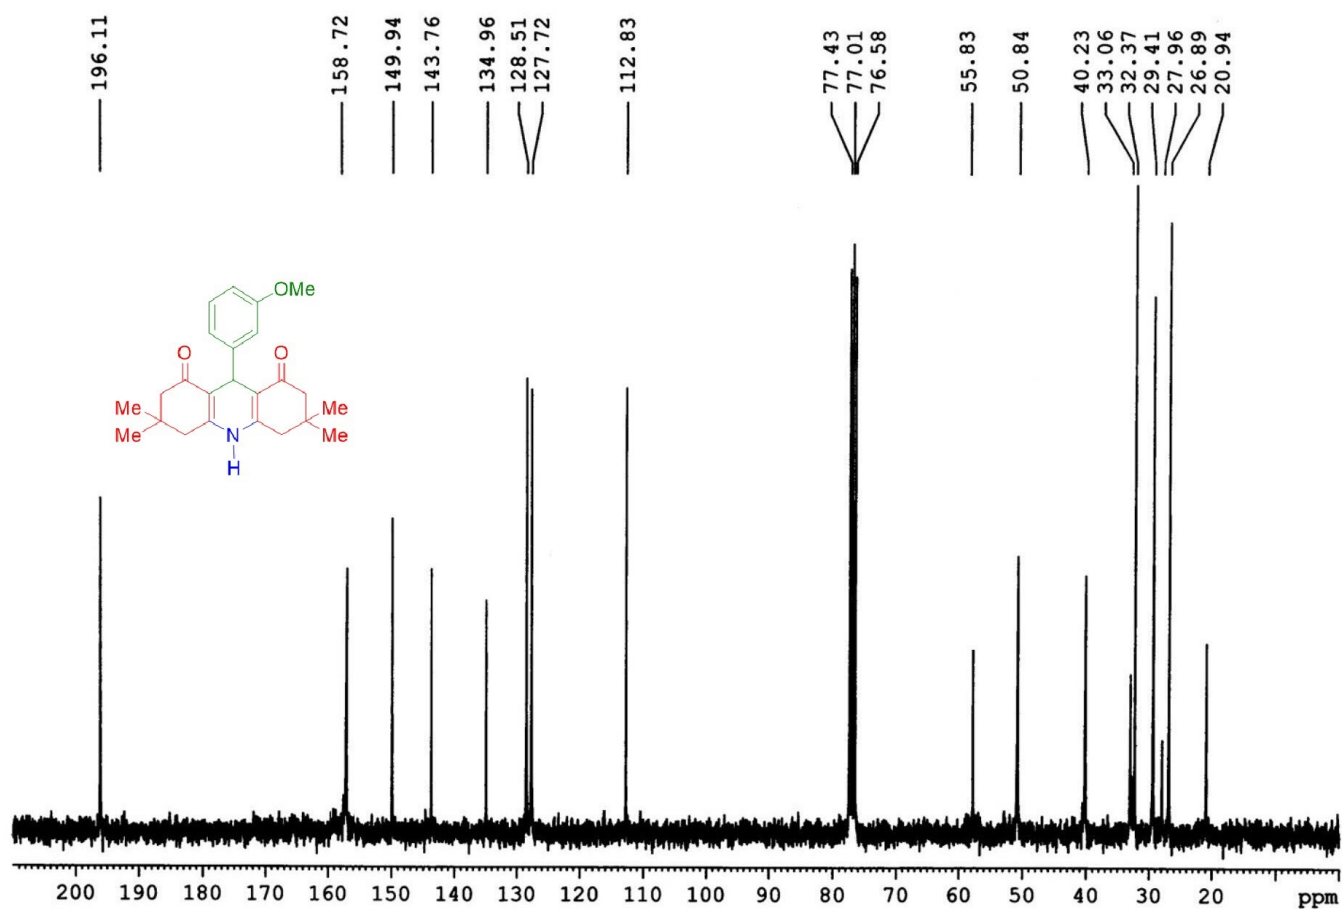

Figure S12.  $^{13}\text{C}$ -NMR spectrum of product *f*.

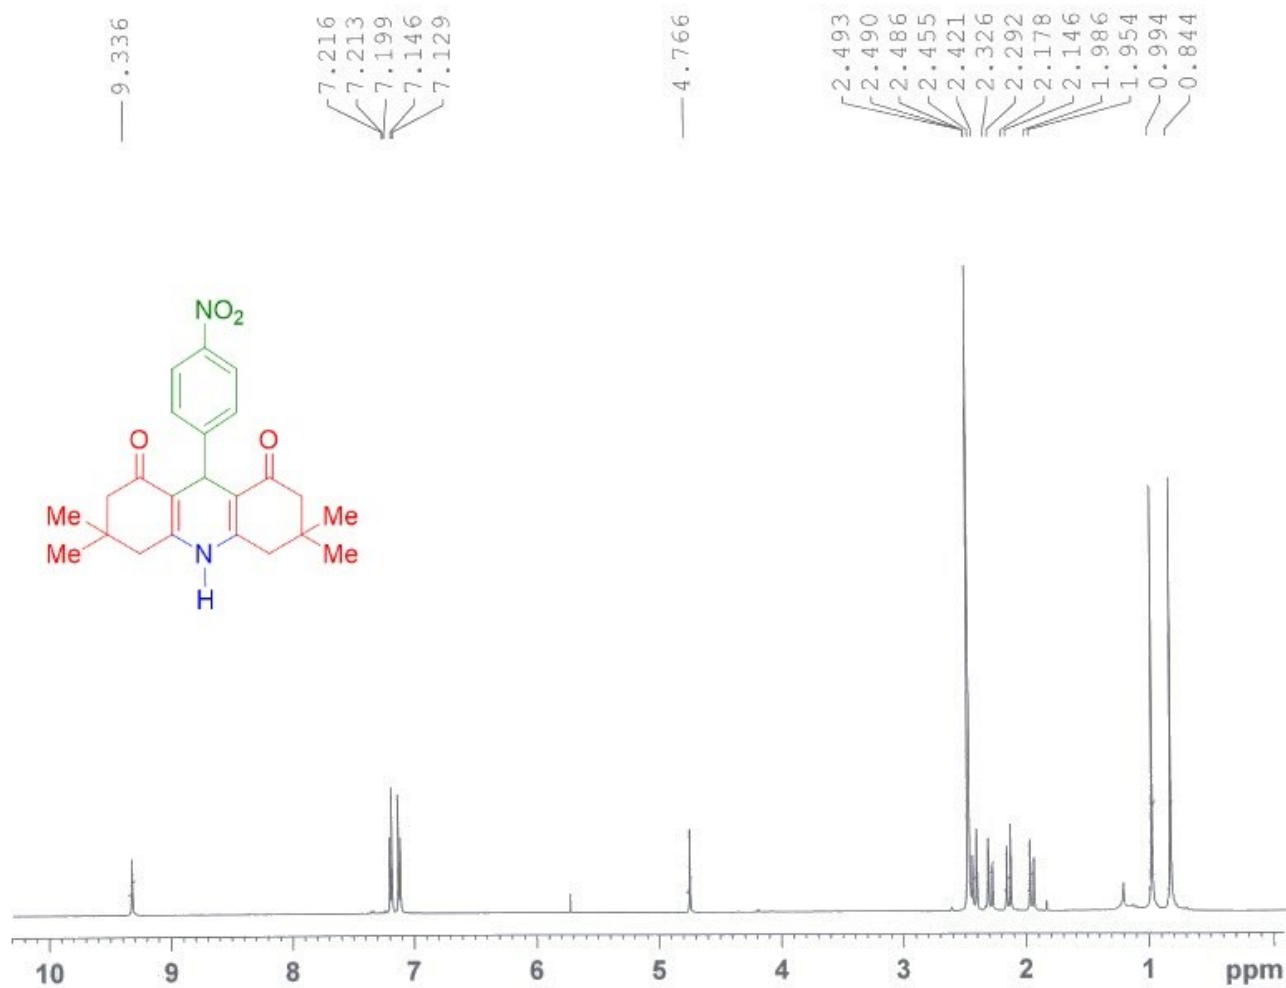

**Figure S13.** <sup>1</sup>H-NMR spectrum of product **g**.



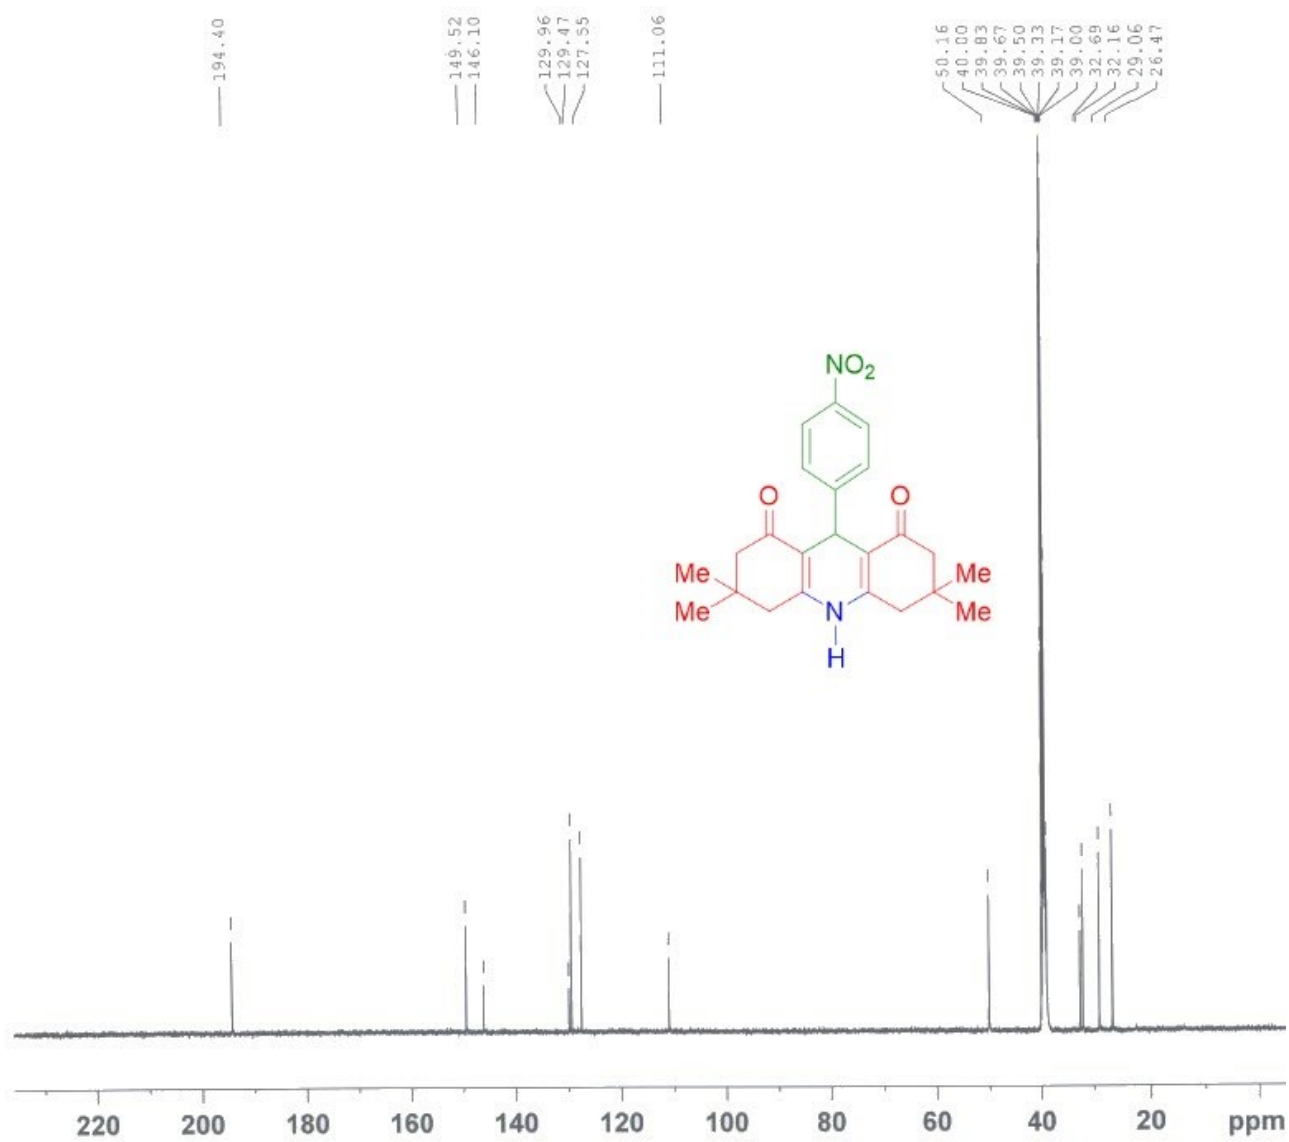

**Figure S14.**  $^{13}\text{C}$ -NMR spectrum of product **g**.

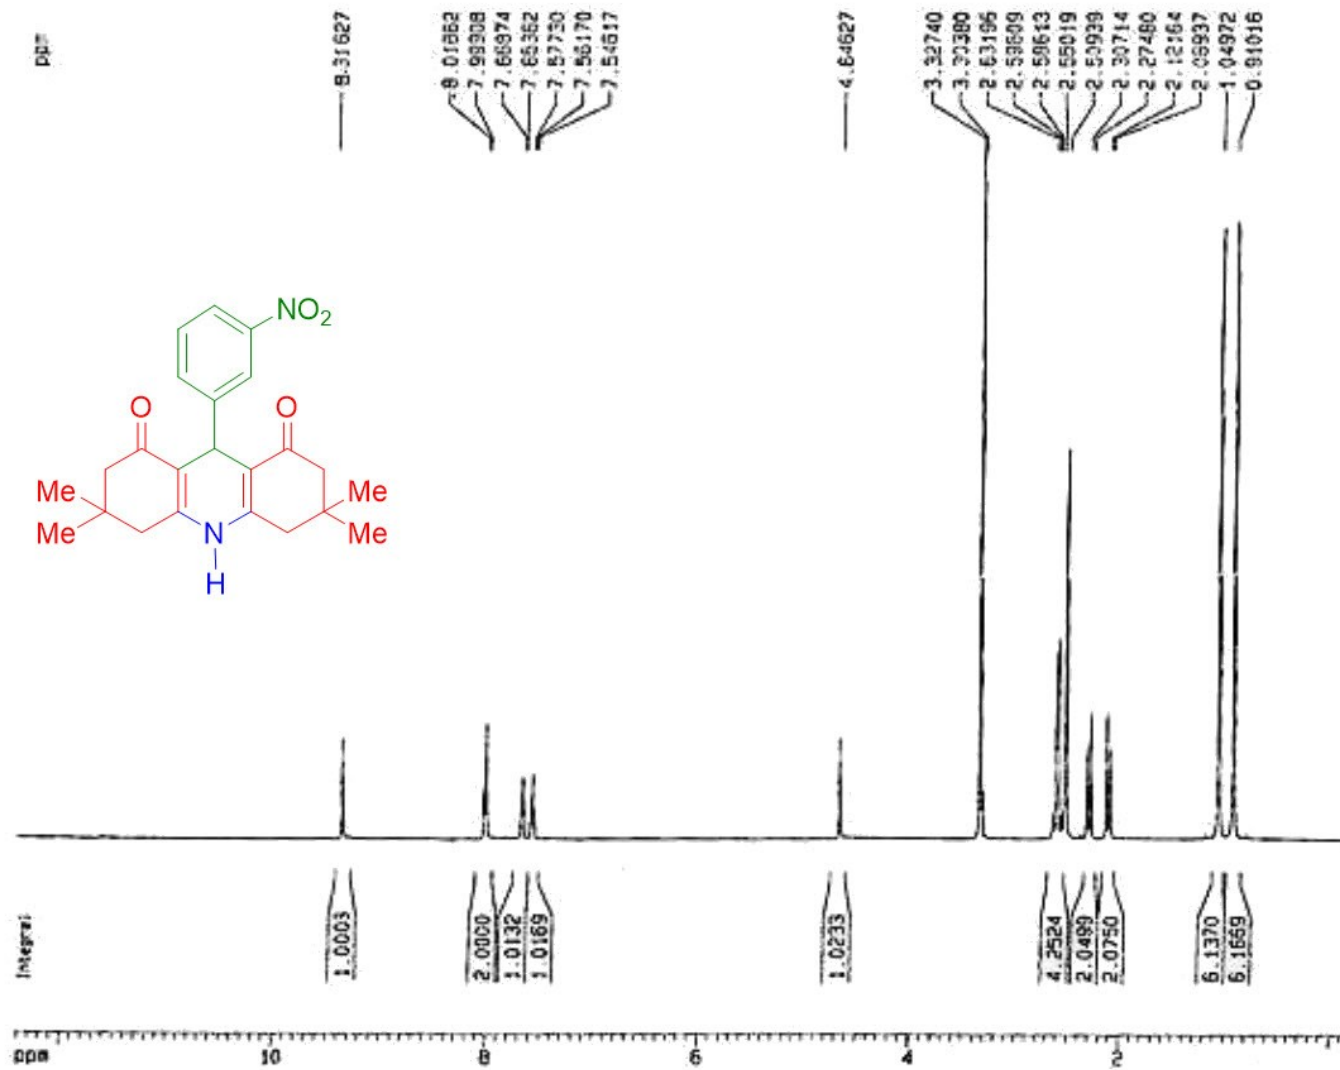

Figure S15. <sup>1</sup>H-NMR spectrum of product *h*.

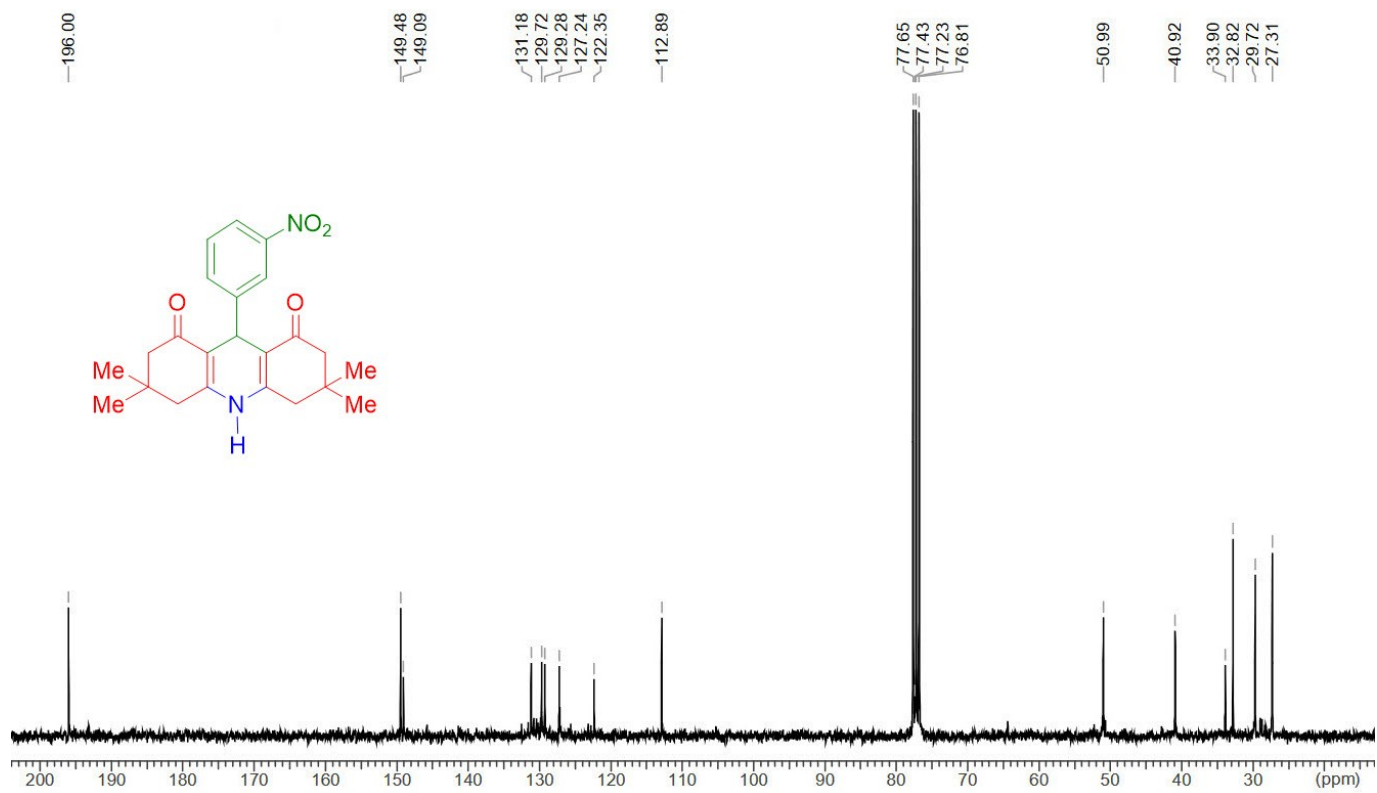

Figure S16. <sup>13</sup>C-NMR spectrum of product *h*.

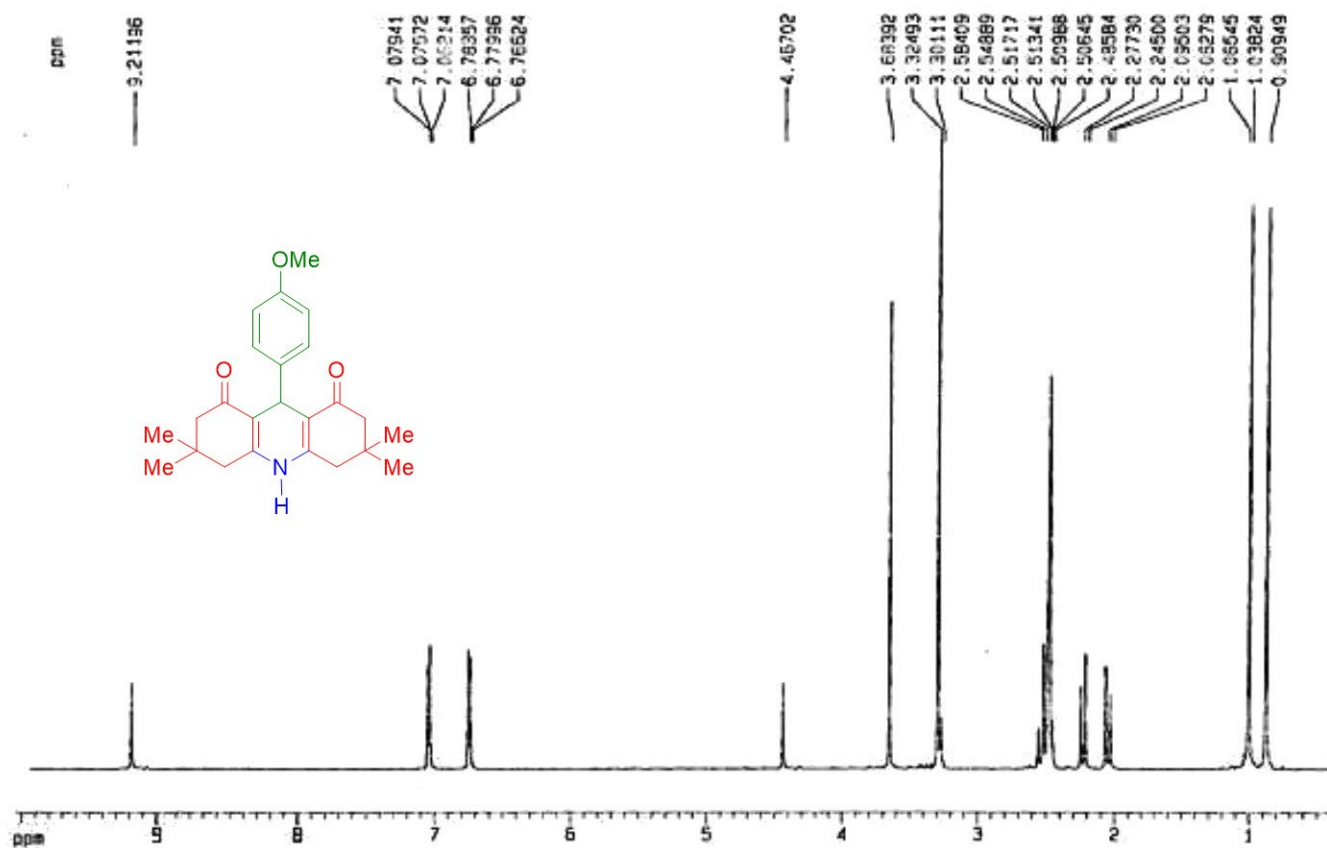

Figure S17. <sup>1</sup>H-NMR spectrum of product *i*.

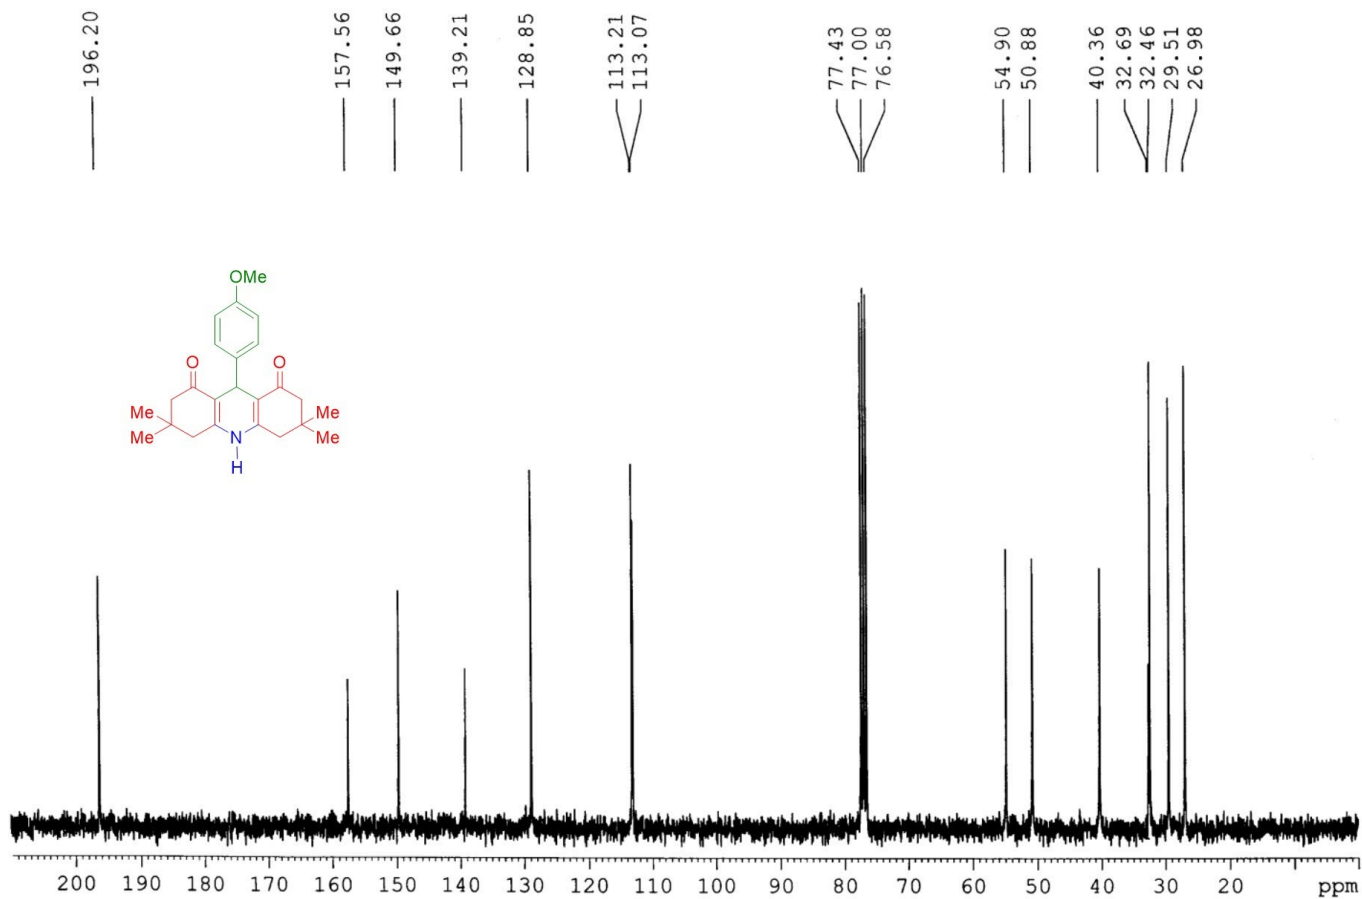

Figure S18.  $^{13}\text{C}$ -NMR spectrum of product *i*.

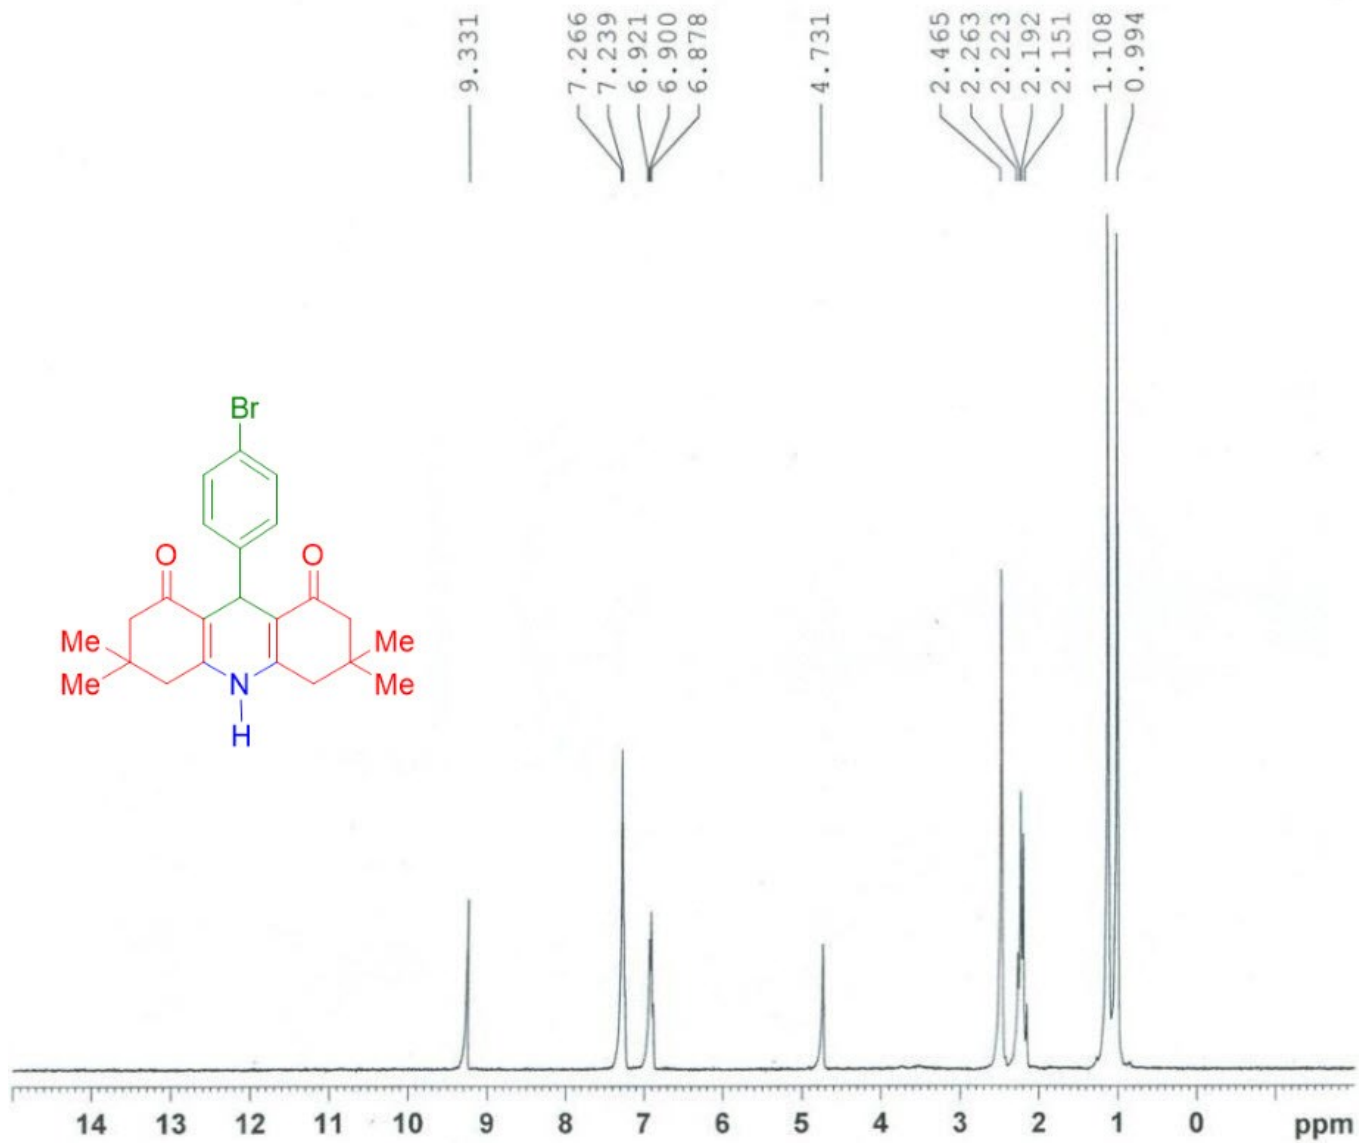

**Figure S19.** <sup>1</sup>H-NMR spectrum of product *j*.

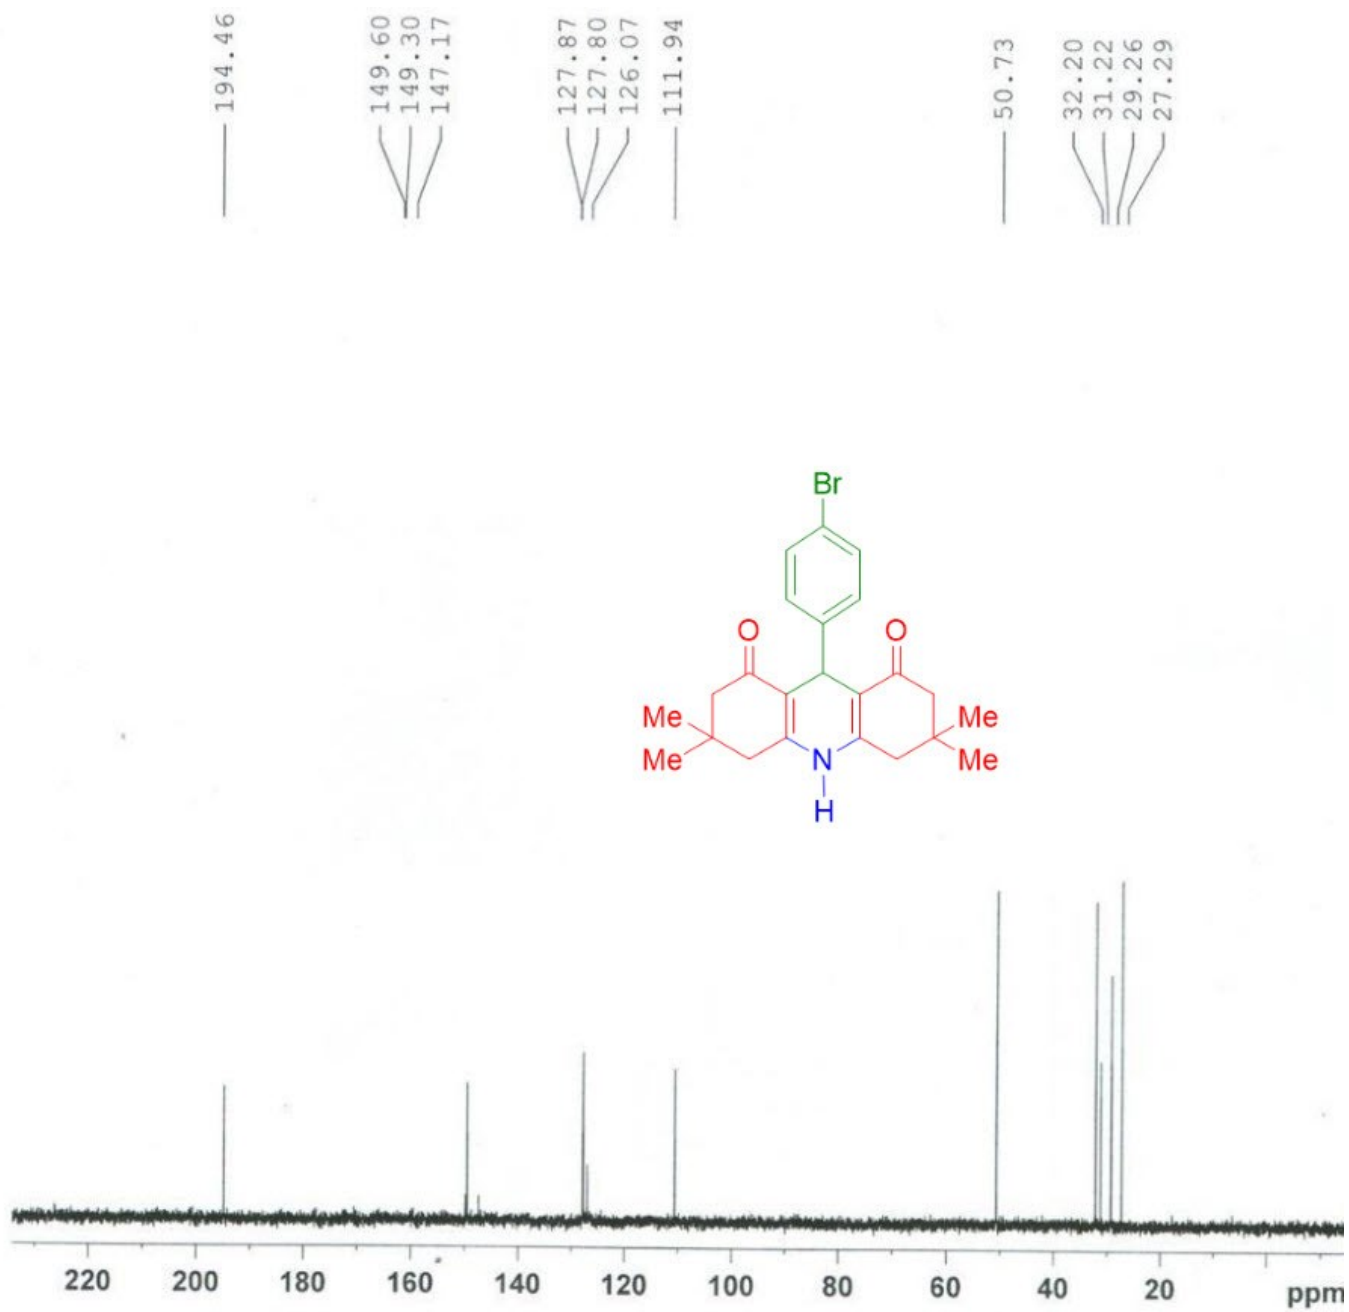

Figure S20. <sup>13</sup>C-NMR spectrum of product *j*.
